# Supplementary material for: Development of Direct Immobilization Technique of Ag Nanoparticles on Resin Substrates Imparting High Antibacterial and Antiviral Activities
Source: MDPI journal article supplement (doi:10.3390/nano12173046), 2022-09-02
Supplement: s1 [file s1]

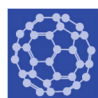

# Development of Direct Immobilization Technique of Ag Nanoparticles on Resin Substrates Imparting High Antibacterial and Antiviral Activities

Satoshi Seino <sup>1\*</sup>, Yuji Ohkubo <sup>1</sup>, Tomonari Magara <sup>1</sup>, Hiroki Enomoto <sup>1</sup>, Eri Nakajima <sup>2</sup>, Tomoki Nishida <sup>2</sup>, Yasuo Imoto <sup>2</sup>, and Takashi Nakagawa <sup>1</sup>

<sup>1</sup> Graduate School of Engineering, Osaka University, 2-1 Yamadaoka, Suita, Osaka 565-0871, Japan

<sup>2</sup> Japan Textile Products Quality and Technology Center, 5-7-3, Shimoyamate-dori, Chuo-ku, Kobe-city 650-0011, Hyogo, Japan

\* Correspondence: seino@mit.eng.osaka-u.ac.jp; Tel.: +81-6-6879-7887

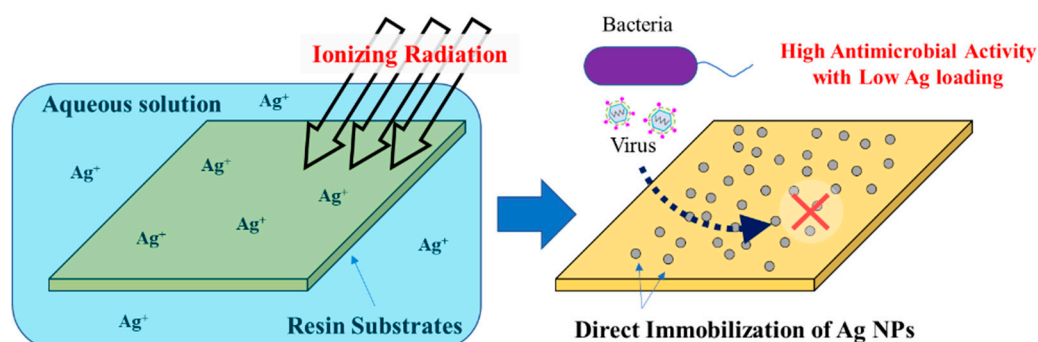

**Figure S1.** Schematic illustration of this work. Ag nanoparticles with high antimicrobial activities were directly immobilized on resin substrates by using chemical reactions induced by ionizing radiation.

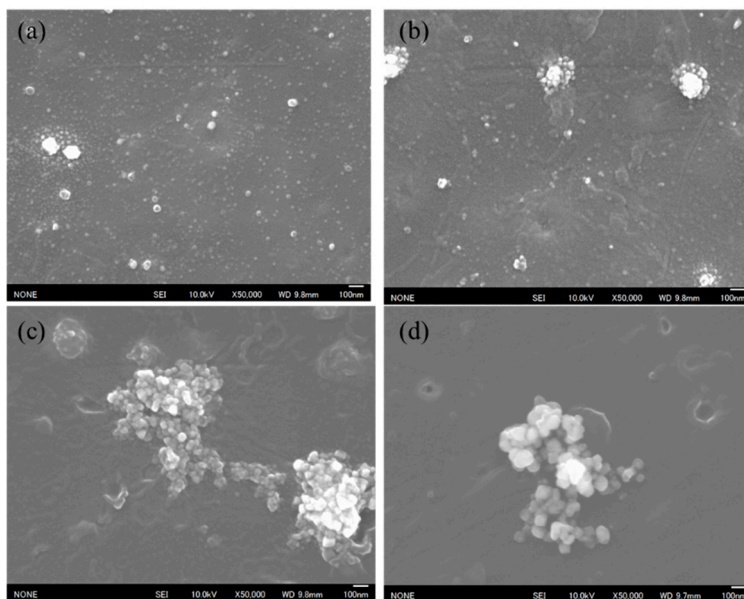

**Figure S2.** SEM images of Ag/ABS samples synthesized by using radiation observed at high magnification ( $\times 50,000$ ).

(a) Gamma-ray, w/o 2-prop., (b) Gamma-ray, w/ 2-prop. (10 vol.%),  
(c) Electron Beam, w/o 2-prop., (d) Electron Beam w/ 2-prop. (10 vol.%).

**Table S1.** Antibacterial activity of Ag/ABS samples against *E.coli*.

| Samples                               |                               | Viable cell count <sup>*1</sup> |
|---------------------------------------|-------------------------------|---------------------------------|
| PE Film (Control)                     | Immediately after inoculation | 4.05                            |
|                                       |                               | 4.06                            |
|                                       |                               | 4.06                            |
|                                       | After 24 h                    | 6.07                            |
|                                       |                               | 6.06                            |
|                                       |                               | 6.10                            |
| ABS (Control)                         | After 24 h                    | 5.67                            |
|                                       |                               | 5.67                            |
|                                       |                               | 5.71                            |
| Ag/ABS<br>(Gamma-ray, w/o 2prop.)     | After 24 h                    | < -0.20                         |
|                                       |                               | < -0.20                         |
|                                       |                               | < -0.20                         |
| Ag/ABS<br>(Electron Beam, w/o 2prop.) | After 24 h                    | < -0.20                         |
|                                       |                               | < -0.20                         |
|                                       |                               | < -0.20                         |

<sup>\*1</sup>The common logarithm for the number of bacterial colonies.

**Table S2** Antibacterial activity of Ag/resin-plate samples synthesized by gamma-ray against *E.coli*.

| Samples                     |                               | Viable cell count <sup>*1</sup> |
|-----------------------------|-------------------------------|---------------------------------|
| PE Film (Control)           | Immediately after inoculation | 4.07                            |
|                             |                               | 4.04                            |
|                             |                               | 4.05                            |
|                             | After 24 h                    | 5.84                            |
|                             |                               | 5.94                            |
|                             |                               | 5.75                            |
| PE (Control)                | After 24 h                    | 3.71                            |
|                             |                               | 5.90                            |
|                             |                               | 4.80                            |
| Ag/PE (w/o 2-prop.)         | After 24 h                    | < -0.20                         |
|                             |                               | < -0.20                         |
|                             |                               | < -0.20                         |
| Ag/PE (w/ 2prop. 10 vol.%)  | After 24 h                    | < -0.20                         |
|                             |                               | < -0.20                         |
|                             |                               | < -0.20                         |
| PP (Control)                | After 24 h                    | 5.76                            |
|                             |                               | 0.45                            |
|                             |                               | 3.23                            |
| Ag/PP (w/o 2-prop.)         | After 24 h                    | < -0.20                         |
|                             |                               | < -0.20                         |
|                             |                               | < -0.20                         |
| Ag/PP (w/ 2prop. 10 vol.%)  | After 24 h                    | < -0.20                         |
|                             |                               | < -0.20                         |
|                             |                               | < -0.20                         |
| PVC (Control)               | After 24 h                    | 5.46                            |
|                             |                               | 5.65                            |
|                             |                               | 5.55                            |
| Ag/PVC (w/o 2-prop.)        | After 24 h                    | < -0.20                         |
|                             |                               | < -0.20                         |
|                             |                               | < -0.20                         |
| Ag/PVC (w/ 2prop. 10 vol.%) | After 24 h                    | < -0.20                         |
|                             |                               | < -0.20                         |
|                             |                               | < -0.20                         |
| PC (Control)                | After 24 h                    | 5.61                            |
|                             |                               | 5.67                            |
|                             |                               | 5.65                            |
| Ag/PC (w/o 2-prop.)         | After 24 h                    | < -0.20                         |
|                             |                               | < -0.20                         |
|                             |                               | < -0.20                         |
| Ag/PC (w/ 2prop. 10 vol.%)  | After 24 h                    | < -0.20                         |
|                             |                               | < -0.20                         |
|                             |                               | < -0.20                         |

<sup>\*1</sup>The common logarithm for the number of bacterial colonies.

**Table S3.** Antiviral activity of Ag/ABS samples synthesized by electron beam against Influenza-A virus.

| Samples                         |                               | Common logarithm of infectivity titre value (PFU/cm <sup>2</sup> ) |
|---------------------------------|-------------------------------|--------------------------------------------------------------------|
| ABS (Control)                   | Immediately after inoculation | 5.46                                                               |
|                                 |                               | 5.43                                                               |
|                                 |                               | 5.47                                                               |
|                                 | After 24 h                    | 4.57                                                               |
|                                 |                               | 4.64                                                               |
|                                 |                               | 4.67                                                               |
| Ag/ABS (EB, w/o 2prop.)         | After 24 h                    | 4.09                                                               |
|                                 |                               | 1.54                                                               |
|                                 |                               | 3.01                                                               |
| Ag/ABS (EB, w/ 2prop. 1vol.%)   | After 24 h                    | 4.43                                                               |
|                                 |                               | 0.97                                                               |
|                                 |                               | 2.574                                                              |
| Ag/ABS (EB, w/ 2prop. 10 vol.%) | After 24 h                    | < 0.80                                                             |
|                                 |                               | 2.61                                                               |
|                                 |                               | 1.19                                                               |

Test Virus; Influenza A virus (H3N2) (A/Hong Kong/8/68;TC adapted ATCC 1679)

**Table S4.** Antiviral activity of Ag/ABS samples synthesized by gamma-ray against SARS-CoV-2.

| Samples                        |                               | Common logarithm of infectivity titre value (PFU/cm <sup>2</sup> ) |
|--------------------------------|-------------------------------|--------------------------------------------------------------------|
| ABS (Control)                  | Immediately after inoculation | 5.67                                                               |
|                                |                               | 5.61                                                               |
|                                |                               | 5.67                                                               |
|                                | After 24 h                    | 4.70                                                               |
|                                |                               | 5.08                                                               |
|                                |                               | 4.67                                                               |
| Ag/ABS (Gamma-ray, w/o 2prop.) | After 24 h                    | 0.97                                                               |
|                                |                               | 1.10                                                               |
|                                |                               | 1.10                                                               |

Test Virus; SARS-CoV-2, (NIID isolate : JPN/TY/WK-521)
